# Supplementary material
Source: Springer Nature journal article supplement (https://www.springermedizin.de/resource/supplementary/13229_2013_98_MOESM8_ESM.pdf/9676178)

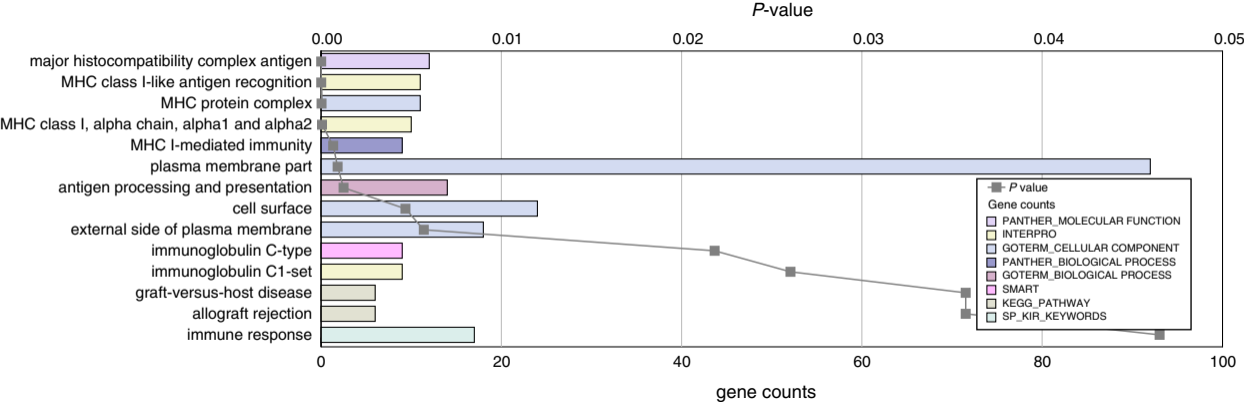

Supplement: MOESM8 [file 9676178]
